# Supplementary material for: Construction of a luminescent square-like Cd6Eu2 nanocluster for the quantitative detection of 2,6-dipicolinic acid as an anthrax biomarker
Source: Royal Society of Chemistry journal article supplement (doi:10.1039/d1tc05929g), 2022-01-01
Supplement: d1tc05929g1.pdf [file d1tc05929g1.pdf]

## Supporting Information

### **Construction of a luminescent square-like Cd<sub>6</sub>Eu<sub>2</sub> nanocluster for the quantitative detection of 2,6-dipicolinic acid as an anthrax biomarker**

Xilong Leng, Dongliang Shi, Xiaoping Yang, Zhen Zhang, Hao Li, Yuebo Cheng, Yanan Ma, and Desmond Schipper

### **Contents**

|                                                                                                        |    |
|--------------------------------------------------------------------------------------------------------|----|
| 1. Reagent and instruments .....                                                                       | 1  |
| 2. <sup>1</sup> H NMR spectrum of the ligand H <sub>4</sub> L <sup>1</sup> .....                       | 2  |
| 3. IR spectra of the ligand H <sub>4</sub> L <sup>1</sup> , <b>1</b> and <b>2</b> .....                | 2  |
| 4. Powder XRD patterns of <b>1</b> and <b>2</b> .....                                                  | 3  |
| 5. UV-vis absorption spectra of the ligand H <sub>4</sub> L <sup>1</sup> , <b>1</b> and <b>2</b> ..... | 4  |
| 6. The excitation and emission spectra of the ligand H <sub>4</sub> L <sup>1</sup> .....               | 4  |
| 7. Chemical structures of DPA and carboxylic acids .....                                               | 5  |
| 8. The excitation and emission spectra of <b>1</b> and <b>2</b> .....                                  | 6  |
| 9. The enhancement of Eu(III) luminescence of <b>2</b> caused by DPA .....                             | 7  |
| 10. The color images of <b>2</b> under a UV lamp (365 nm) with addition of DPA .....                   | 7  |
| 11. The fluorescent response of <b>2</b> to DPA and interferents .....                                 | 8  |
| 12. The lanthanide luminescence response of the recycled sample of <b>2</b> to DPA .....               | 9  |
| 13. The luminescence response of <b>2</b> to DPA in the presence of more interferents .....            | 9  |
| 14. UV-vis titration of <b>2</b> to the addition of DPA .....                                          | 10 |
| 15. UV-vis absorption spectra of the PDA and carboxylic acids .....                                    | 10 |
| 16. The lanthanide luminescence lifetimes of <b>2</b> with the addition of DPA .....                   | 11 |
| 17. The lanthanide luminescence spectra of <b>2</b> with the addition of DPA .....                     | 11 |
| 18. X-ray crystallography .....                                                                        | 12 |

## **1. Reagent and instruments**

All chemicals were purchased from commercial sources and directly used without further purified. The total protein content in fetal calf serum (FCS) is 35-45 g/L. Elemental analyses were performed on a EURO EA3000. NMR spectra were obtained on an AVANCE III AV500 at 298 K. IR spectra were measured on a FTIR-650 spectrometer. The thermogravimetric spectra were obtained on a TA Instruments Q600. Melting points were obtained on an XT-4 electrothermal micromelting point apparatus. Powder XRD spectra were recorded on a D8 Advance. Scanning electron microscopy (SEM) image and energy dispersive X-ray (EDX) spectroscopy were obtained from a Nova NanoSEM 200 microscope. UV-vis absorption spectra were measured using an UV-3600 spectrophotometer. Excitation and emission spectra were obtained using a FLS 980 fluorimeter.

## 2. $^1\text{H}$ NMR spectrum of the ligand $\text{H}_4\text{L}^1$

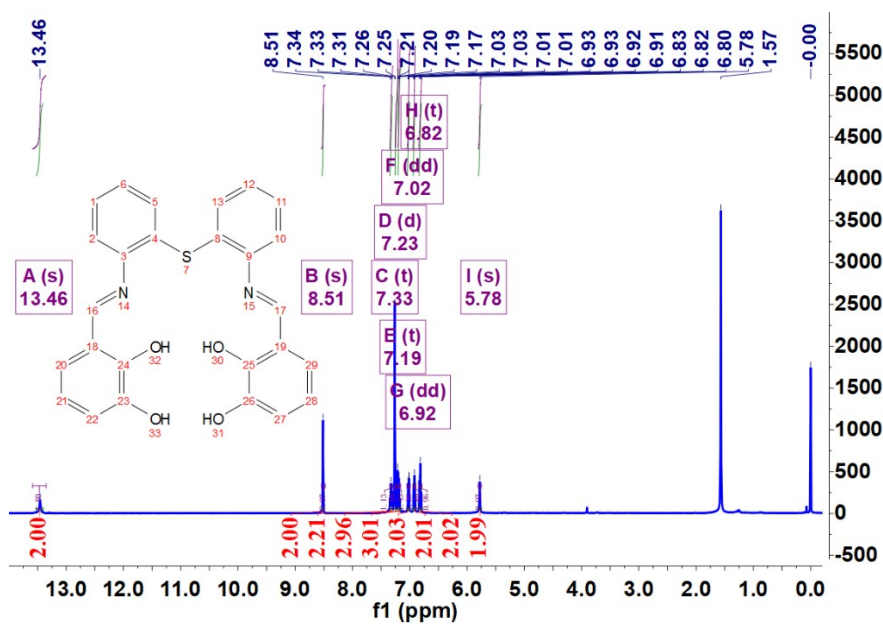

Figure S1.  $^1\text{H}$  NMR spectrum of the Schiff base ligand  $\text{H}_4\text{L}^1$  in  $\text{CDCl}_3$ .

## 3. IR spectra of the ligand $\text{H}_4\text{L}^1$ , 1 and 2

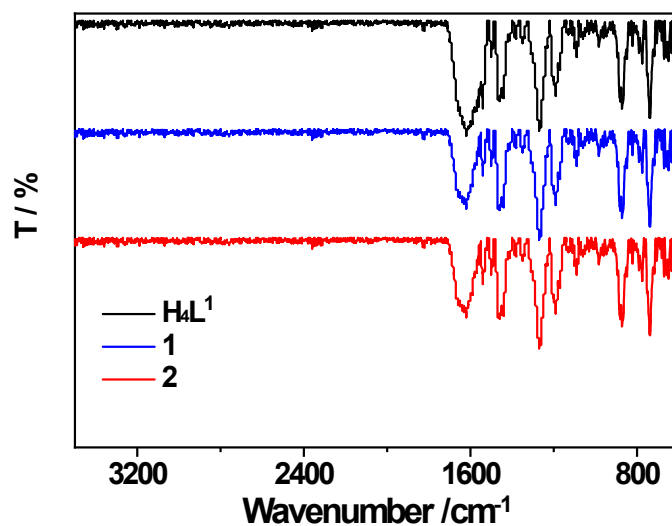

Figure S2. IR spectra of the ligand  $\text{H}_4\text{L}^1$ , 1 and 2.

#### **4. Powder XRD patterns of 1 and 2**

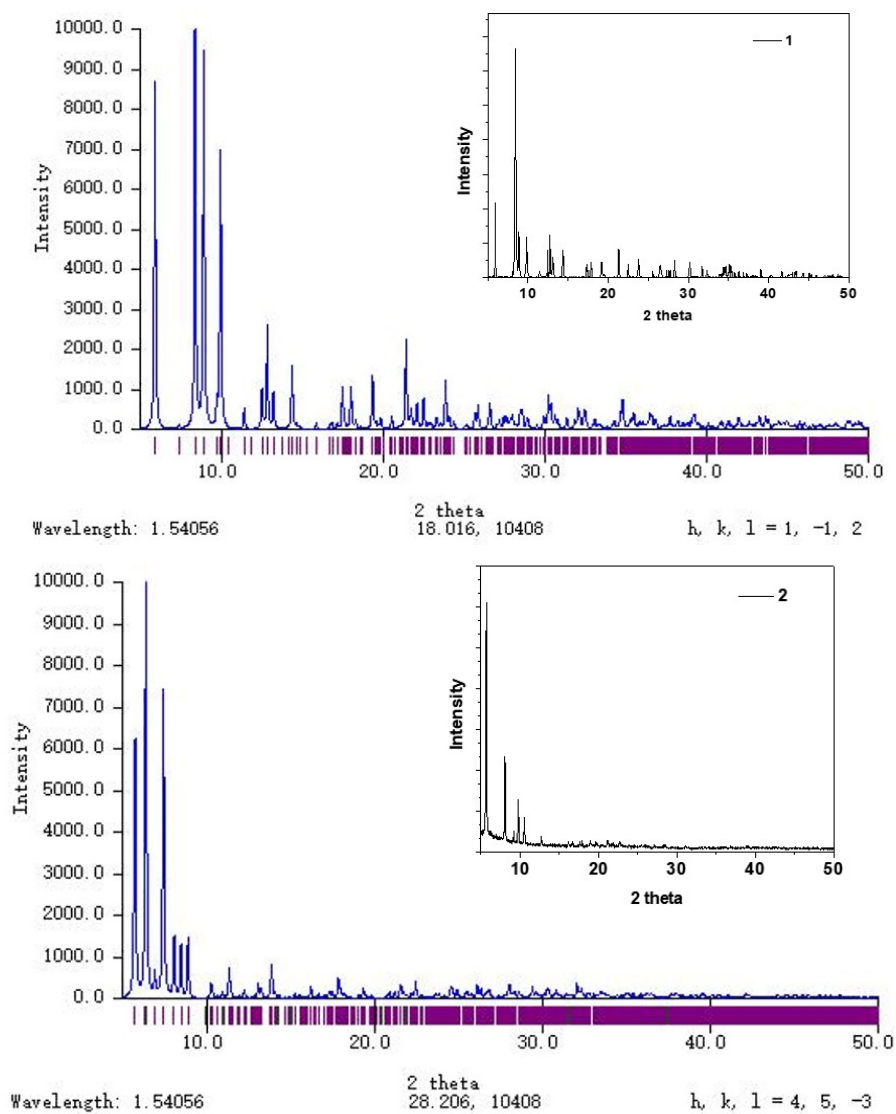

**Figure S3.** Powder XRD patterns of 1 and 2.

#### **5. UV-vis absorption spectra of the ligand H<sub>4</sub>L<sup>1</sup>, 1 and 2**

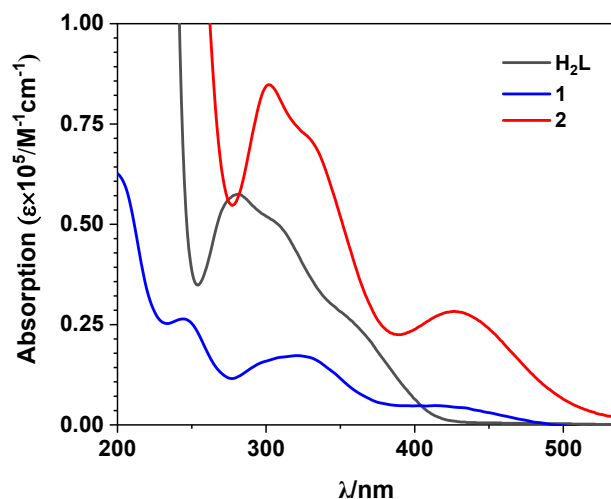

**Figure S4.** UV-vis absorption spectra of the ligand  $H_4L^1$ , **1** and **2** in  $CH_3CN$ .

### 6. The excitation and emission spectra of the ligand $H_4L^1$

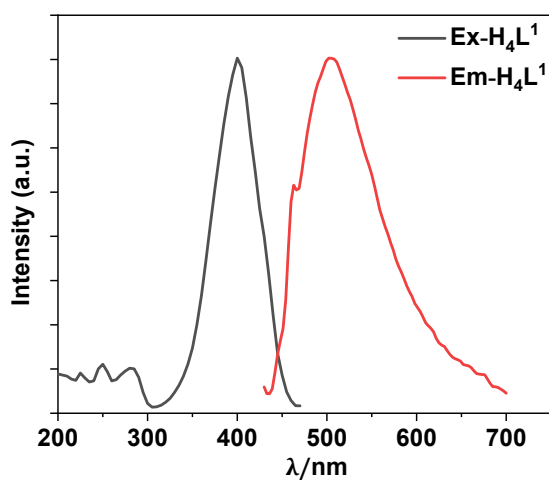

**Figure S5.** The excitation ( $\lambda_{em} = 502$  nm) and emission ( $\lambda_{ex} = 400$  nm) spectra of the free ligand  $H_4L^1$  ( $10 \mu M$ ) in  $CH_3CN$ .

## 7. Chemical structures of DPA and carboxylic acids

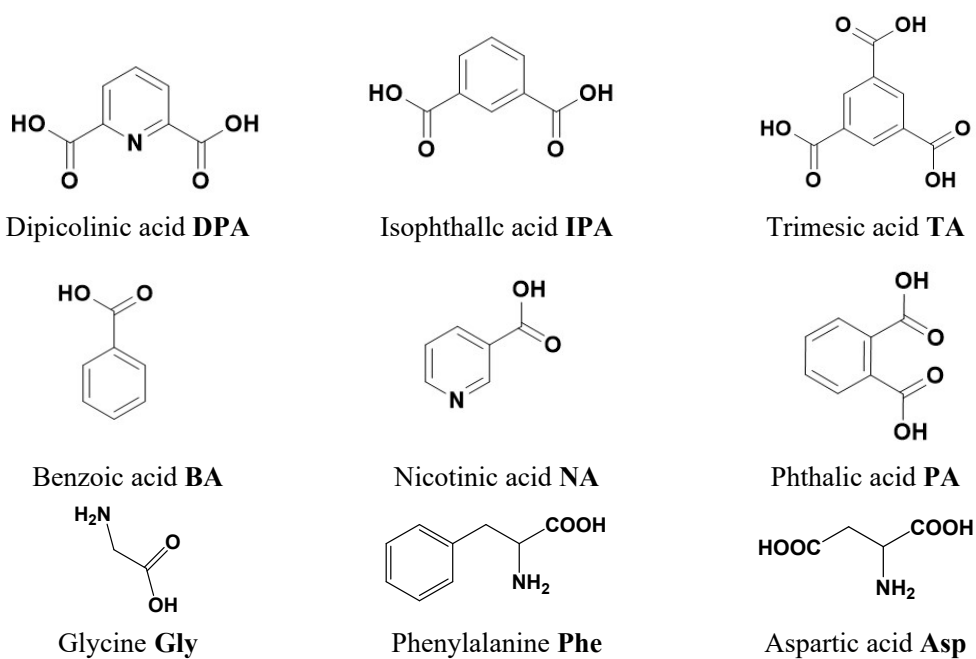

**Scheme S1.** Chemical structures of Chemical structures of DPA and carboxylic acids.

## 8. The excitation and emission spectra of 1 and 2

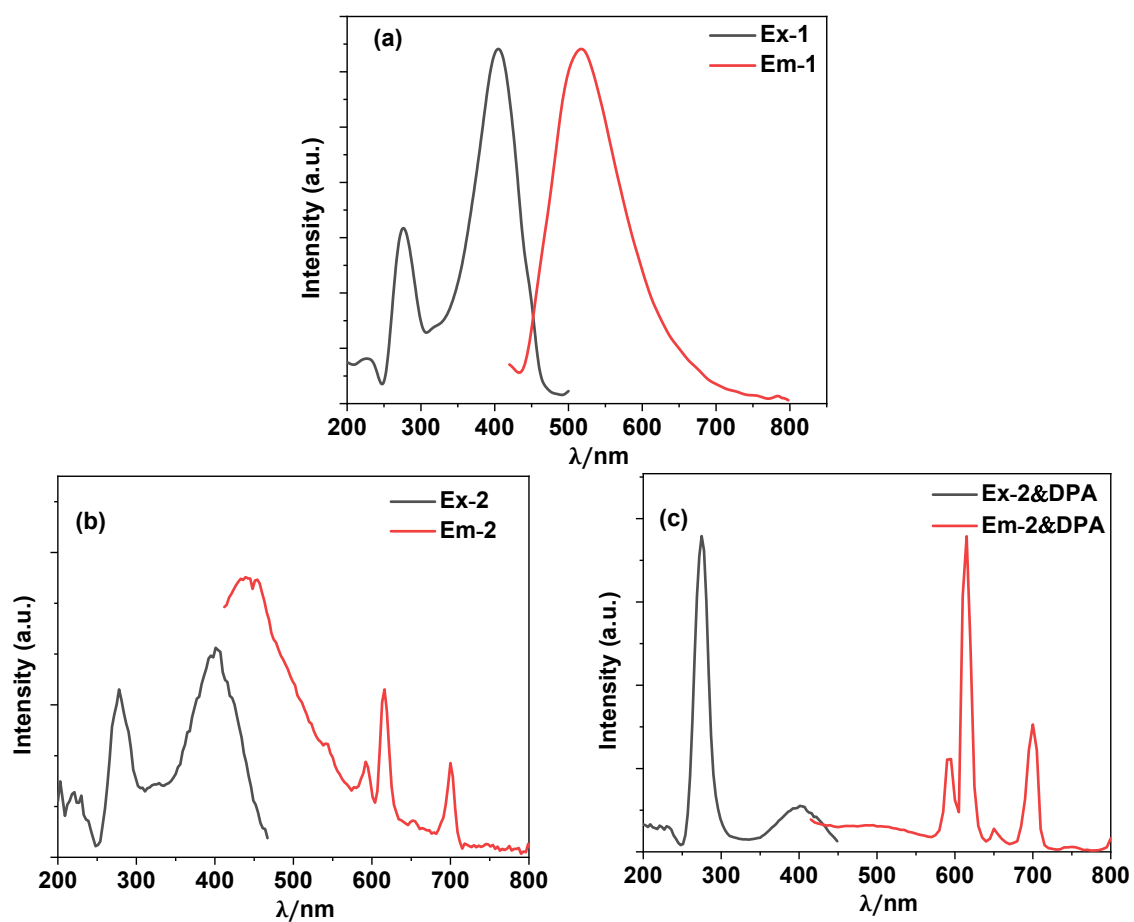

**Figure S6.** The excitation ( $\lambda_{em} = 520$  nm) and emission ( $\lambda_{ex} = 402$  nm) spectra of **1** (10  $\mu$ M) in  $\text{CH}_3\text{CN}$  (a); and the excitation ( $\lambda_{em} = 615$  nm) and emission ( $\lambda_{ex} = 275$  nm) spectra of **2** (10  $\mu$ M) before (b) and after (c) the addition of DPA (200  $\mu$ M) in  $\text{CH}_3\text{CN}$ .

## 9. The enhancement of Eu(III) luminescence of 2 caused by DPA

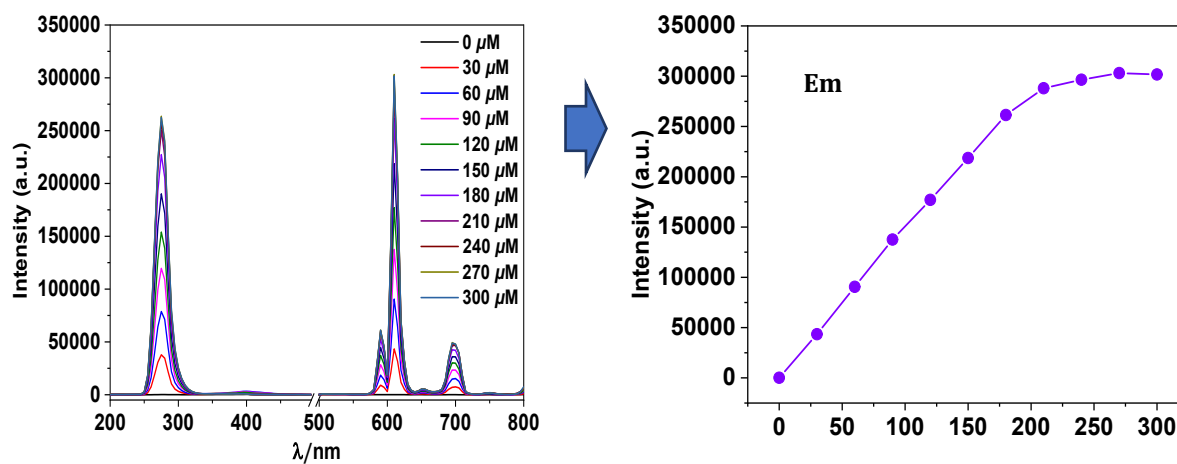

**Figure S7.** The excitation ( $\lambda_{\text{em}} = 615 \text{ nm}$ ) and emission ( $\lambda_{\text{ex}} = 275 \text{ nm}$ ) spectra of **2** (10  $\mu\text{M}$ ) with the addition of DPA in  $\text{CH}_3\text{CN}$ .

## 10. The color images of 2 under a UV lamp (365 nm) with addition of DPA

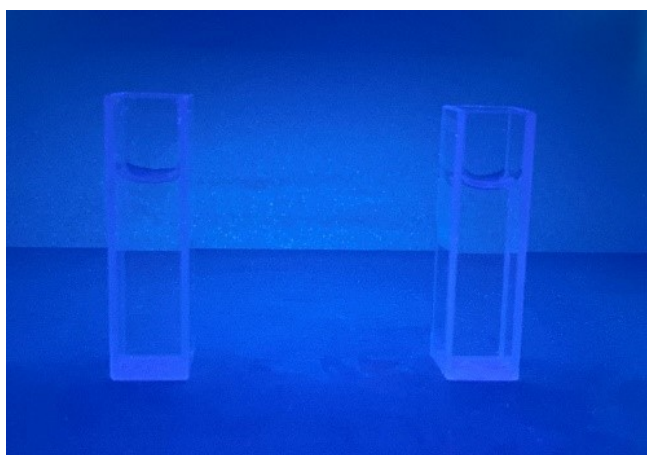

**Figure S8.** The color images of **2** (10  $\mu\text{M}$ ) under a UV lamp (365 nm) with addition of 100  $\mu\text{M}$  (left) and 200  $\mu\text{M}$  (right) DPA.



## 11. The fluorescent response of 2 to DPA and interferences

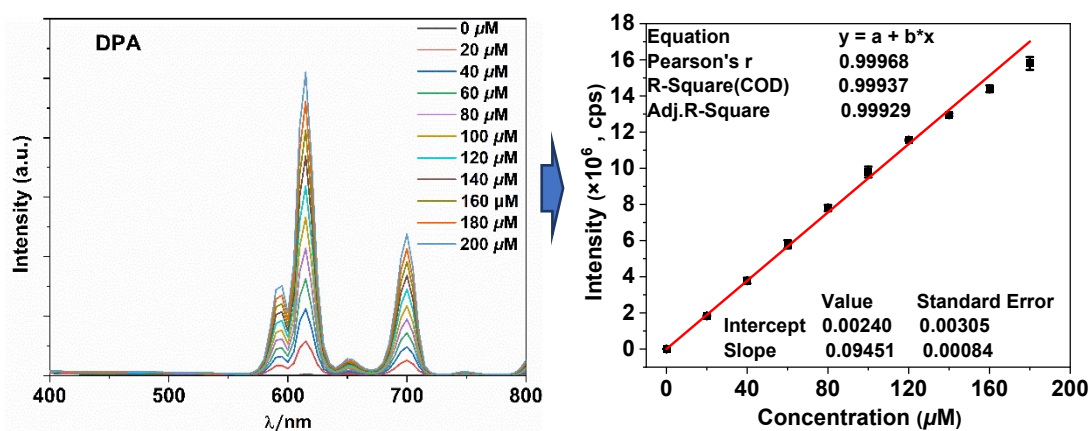

(a)

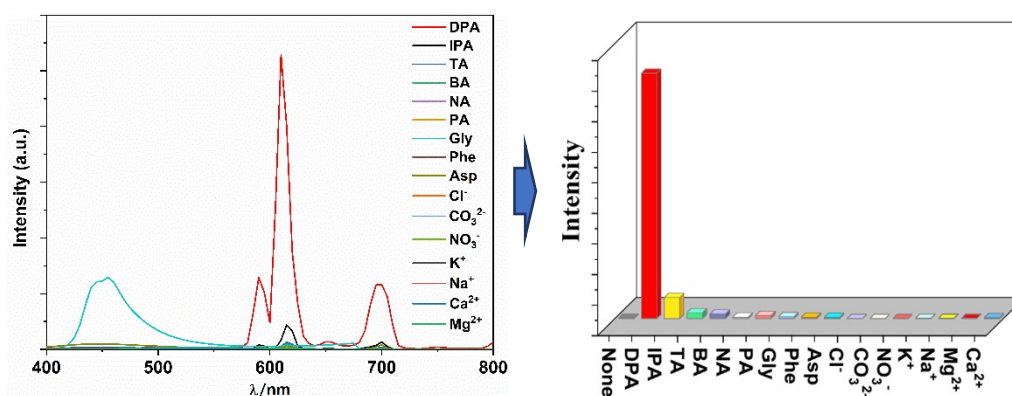

(b)

**Figure S9.** (a) The lanthanide luminescent response of **2** ( $10 \mu\text{M}$ ) to the addition of different concentrations of DPA in  $\text{CH}_3\text{CN}$  ( $\lambda_{\text{ex}} = 275 \text{ nm}$ , left), and relationship plot between luminescence intensities and concentrations of added DPA (right). (b) The emission response of **2** ( $10 \mu\text{M}$ ) to DPA and various carboxylic acids and ions ( $200 \mu\text{M}$ ) in  $\text{CH}_3\text{CN}$  ( $\lambda_{\text{ex}} = 275 \text{ nm}$ , left), and the emission intensities of **2** at  $615 \text{ nm}$  (right).

## 12. The lanthanide luminescence response of the recycled sample of 2 to DPA

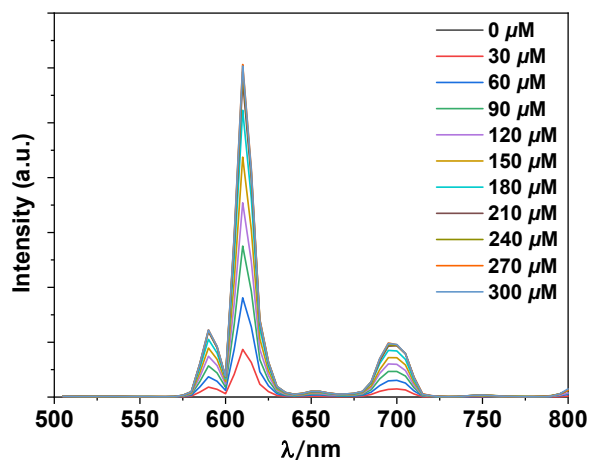

**Figure S10.** The lanthanide luminescence response of the recycled sample of 2 ( $10 \mu\text{M}$ ) to DPA in  $\text{CH}_3\text{CN}$  ( $\lambda_{\text{ex}} = 275 \text{ nm}$ ).

## 13. The luminescence response of 2 to DPA in the presence of more interferents

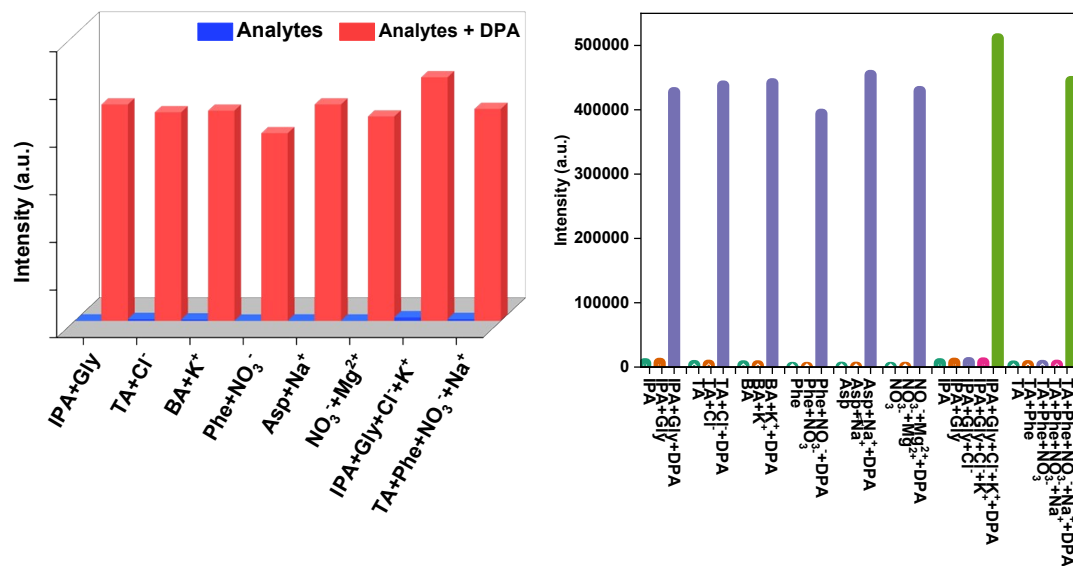

**Figure S11.** The luminescence intensity changes of 2 ( $10 \mu\text{M}$ ) at 615 nm before and after the addition of DPA ( $60 \mu\text{M}$ ) in the presence of two to five kinds of interferents ( $600 \mu\text{M}$ ).

#### 14. UV-vis titration of 2 to the addition of DPA

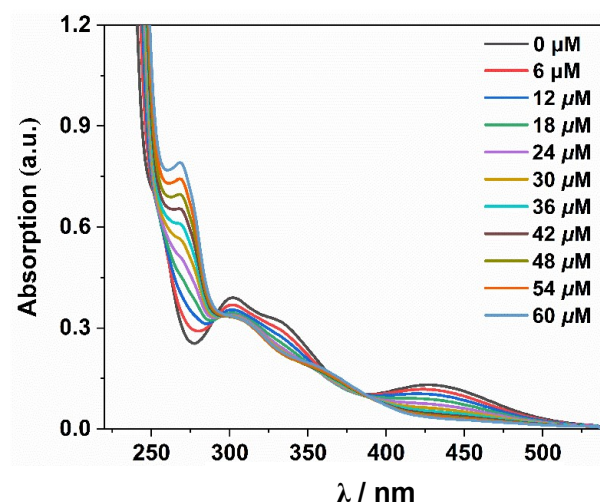

Figure S12. UV-vis titration of 2 (10 μM) with the addition of DPA in CH<sub>3</sub>CN.

#### 15. UV-vis absorption spectra of the PDA and carboxylic acids

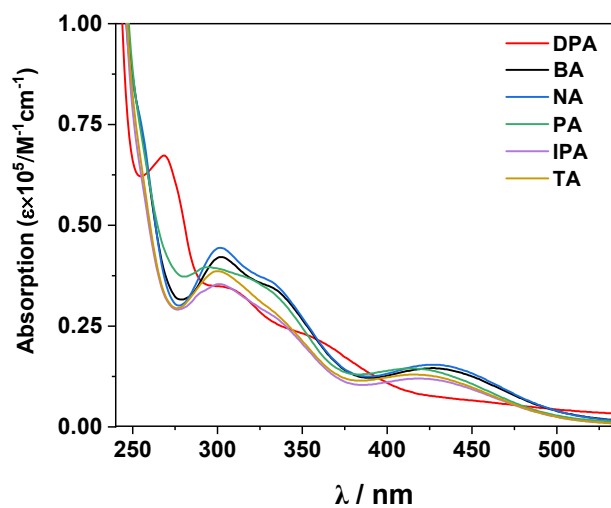

Figure S13. UV-vis absorption spectra of DPA and carboxylic acids in CH<sub>3</sub>CN ( $c = 10 \mu\text{M}$ ).

## 16. The lanthanide luminescence lifetimes of **2** with the addition of DPA

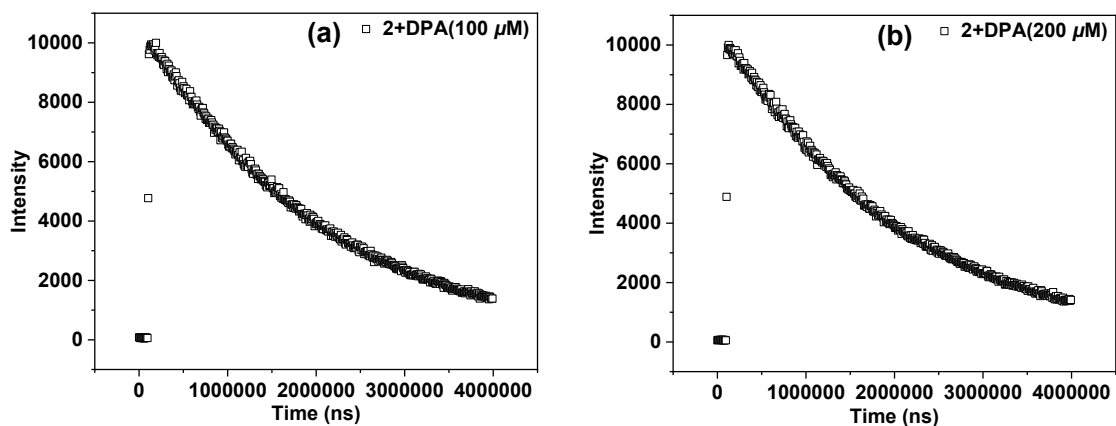

**Figure S14.** The lanthanide luminescence lifetimes **2** ( $10 \mu\text{M}$ ) with the addition of  $100 \mu\text{M}$  (a) and  $200 \mu\text{M}$  (b) of DPA.

## 17. The lanthanide luminescence spectra of **2** with the addition of DPA

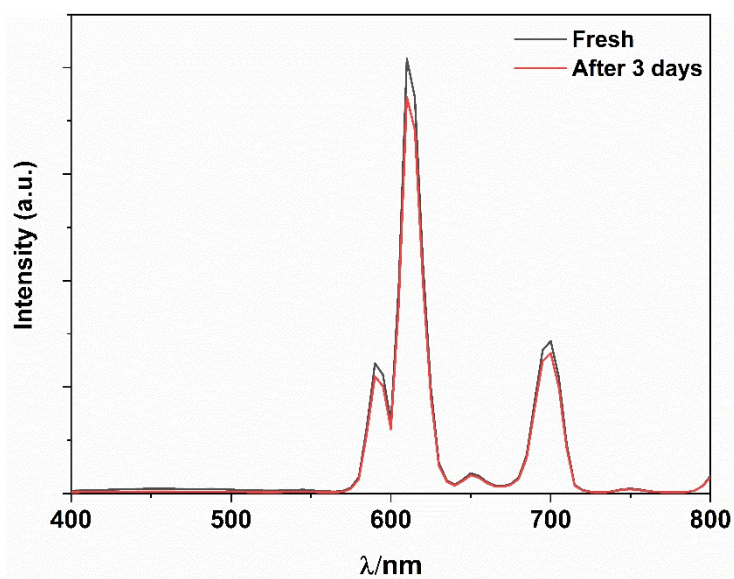

**Figure S15.** The emission spectra of **2** ( $10 \mu\text{M}$ ) with the addition of DPA ( $60 \mu\text{M}$ ).

## 18. X-ray crystallography

**Table S1.** Selected bond lengths (Å) and angles (°) for **1**

|                  |           |                   |          |
|------------------|-----------|-------------------|----------|
| Ho(1)-O(13)      | 2.248(7)  | O(13)-Ho(1)-O(14) | 73.7(3)  |
| Ho(1)-O(4)       | 2.269(9)  | O(4)-Ho(1)-O(14)  | 95.9(3)  |
| Ho(1)-O(3)       | 2.285(9)  | O(3)-Ho(1)-O(14)  | 73.4(3)  |
| Ho(1)-O(1)       | 2.310(8)  | O(1)-Ho(1)-O(14)  | 91.7(3)  |
| Ho(1)-O(9)       | 2.327(9)  | O(9)-Ho(1)-O(14)  | 144.3(3) |
| Ho(1)-O(14)      | 2.333(7)  | O(13)-Ho(1)-O(2)  | 131.2(3) |
| Ho(1)-O(2)       | 2.364(8)  | O(4)-Ho(1)-O(2)   | 141.5(2) |
| Ho(1)-O(10)      | 2.398(8)  | O(3)-Ho(1)-O(2)   | 69.9(3)  |
| Ho(2)-O(12)      | 2.278(8)  | O(1)-Ho(1)-O(2)   | 70.0(3)  |
| Ho(2)-O(7)       | 2.248(7)  | O(9)-Ho(1)-O(2)   | 75.4(3)  |
| Ho(2)-O(8)       | 2.247(13) | O(14)-Ho(1)-O(2)  | 73.8(3)  |
| Ho(2)-O(10)      | 2.309(8)  | O(13)-Ho(1)-O(10) | 72.4(3)  |
| Ho(2)-O(6)       | 2.331(11) | O(4)-Ho(1)-O(10)  | 81.0(3)  |
| Ho(2)-O(5)       | 2.383(11) | O(3)-Ho(1)-O(10)  | 135.2(3) |
| Ho(2)-O(13)      | 2.388(8)  | O(1)-Ho(1)-O(10)  | 75.6(3)  |
| Ho(2)-O(11)      | 2.578(14) | O(9)-Ho(1)-O(10)  | 69.5(3)  |
| Cd(1)-O(15)      | 2.223(8)  | O(14)-Ho(1)-O(10) | 145.7(3) |
| Cd(1)-O(2)       | 2.254(7)  | O(2)-Ho(1)-O(10)  | 127.9(3) |
| Cd(1)-O(3)       | 2.298(10) | O(12)-Ho(2)-O(7)  | 79.8(3)  |
| Cd(1)-N(2)       | 2.377(10) | O(12)-Ho(2)-O(8)  | 96.7(4)  |
| Cd(1)-O(16)      | 2.420(11) | O(7)-Ho(2)-O(8)   | 70.4(4)  |
| Cd(1)-N(1)       | 2.425(12) | O(12)-Ho(2)-O(10) | 141.1(3) |
| Cd(1)-S(1)       | 2.913(4)  | O(7)-Ho(2)-O(10)  | 131.0(3) |
| Cd(2)-O(6)       | 2.292(9)  | O(8)-Ho(2)-O(10)  | 77.5(4)  |
| Cd(2)-N(4)       | 2.317(13) | O(12)-Ho(2)-O(6)  | 72.4(4)  |
| Cd(2)-O(7)       | 2.357(9)  | O(7)-Ho(2)-O(6)   | 72.4(3)  |
| Cd(2)-N(3)       | 2.357(14) | O(8)-Ho(2)-O(6)   | 142.5(3) |
| Cd(2)-O(17)      | 2.368(7)  | O(10)-Ho(2)-O(6)  | 133.1(3) |
| Cd(2)-O(18)      | 2.507(6)  | O(12)-Ho(2)-O(5)  | 92.9(4)  |
| Cd(2)-S(2)       | 2.867(4)  | O(7)-Ho(2)-O(5)   | 142.6(4) |
| O(13)-Ho(1)-O(4) | 77.2(3)   | O(8)-Ho(2)-O(5)   | 146.9(4) |
| O(13)-Ho(1)-O(3) | 131.3(3)  | O(10)-Ho(2)-O(5)  | 75.2(3)  |
| O(4)-Ho(1)-O(3)  | 71.7(3)   | O(6)-Ho(2)-O(5)   | 70.5(3)  |
| O(13)-Ho(1)-O(1) | 75.7(3)   | O(12)-Ho(2)-O(13) | 69.6(3)  |
| O(4)-Ho(1)-O(1)  | 148.4(3)  | O(7)-Ho(2)-O(13)  | 132.8(3) |
| O(3)-Ho(1)-O(1)  | 139.7(3)  | O(8)-Ho(2)-O(13)  | 78.3(4)  |
| O(13)-Ho(1)-O(9) | 141.8(3)  | O(10)-Ho(2)-O(13) | 71.5(3)  |
| O(4)-Ho(1)-O(9)  | 96.9(3)   | O(6)-Ho(2)-O(13)  | 126.7(3) |
| O(3)-Ho(1)-O(9)  | 79.2(3)   | O(5)-Ho(2)-O(13)  | 75.6(4)  |
| O(1)-Ho(1)-O(9)  | 94.5(3)   | O(12)-Ho(2)-O(11) | 145.1(4) |

|                   |          |                   |           |
|-------------------|----------|-------------------|-----------|
| O(7)-Ho(2)-O(11)  | 72.4(4)  | N(2)-Cd(1)-S(1)   | 65.2(3)   |
| O(8)-Ho(2)-O(11)  | 93.6(5)  | O(16)-Cd(1)-S(1)  | 82.0(3)   |
| O(10)-Ho(2)-O(11) | 73.8(4)  | N(1)-Cd(1)-S(1)   | 71.7(2)   |
| O(6)-Ho(2)-O(11)  | 79.2(4)  | O(6)-Cd(2)-N(4)   | 146.5(4)  |
| O(5)-Ho(2)-O(11)  | 96.4(4)  | O(6)-Cd(2)-O(7)   | 71.1(3)   |
| O(13)-Ho(2)-O(11) | 145.3(4) | N(4)-Cd(2)-O(7)   | 76.4(4)   |
| O(15)-Cd(1)-O(2)  | 89.5(3)  | O(6)-Cd(2)-N(3)   | 79.1(4)   |
| O(15)-Cd(1)-O(3)  | 93.7(3)  | N(4)-Cd(2)-N(3)   | 133.1(4)  |
| O(2)-Cd(1)-O(3)   | 71.6(3)  | O(7)-Cd(2)-N(3)   | 150.2(3)  |
| O(15)-Cd(1)-N(2)  | 79.4(4)  | O(6)-Cd(2)-O(17)  | 85.8(3)   |
| O(2)-Cd(1)-N(2)   | 147.9(3) | N(4)-Cd(2)-O(17)  | 97.2(4)   |
| O(3)-Cd(1)-N(2)   | 79.2(3)  | O(7)-Cd(2)-O(17)  | 80.6(3)   |
| O(15)-Cd(1)-O(16) | 172.9(3) | N(3)-Cd(2)-O(17)  | 97.1(3)   |
| O(2)-Cd(1)-O(16)  | 83.7(3)  | O(6)-Cd(2)-O(18)  | 59.6(3)   |
| O(3)-Cd(1)-O(16)  | 82.0(3)  | N(4)-Cd(2)-O(18)  | 107.7(4)  |
| N(2)-Cd(1)-O(16)  | 105.3(4) | O(7)-Cd(2)-O(18)  | 81.4(3)   |
| O(15)-Cd(1)-N(1)  | 84.6(4)  | N(3)-Cd(2)-O(18)  | 84.1(4)   |
| O(2)-Cd(1)-N(1)   | 80.2(3)  | O(17)-Cd(2)-O(18) | 144.7(3)  |
| O(3)-Cd(1)-N(1)   | 151.8(3) | O(6)-Cd(2)-S(2)   | 142.9(3)  |
| N(2)-Cd(1)-N(1)   | 127.7(4) | N(4)-Cd(2)-S(2)   | 69.0(3)   |
| O(16)-Cd(1)-N(1)  | 96.4(4)  | O(7)-Cd(2)-S(2)   | 134.7(2)  |
| O(15)-Cd(1)-S(1)  | 105.0(3) | N(3)-Cd(2)-S(2)   | 71.7(3)   |
| O(2)-Cd(1)-S(1)   | 146.7(2) | O(17)-Cd(2)-S(2)  | 75.81(18) |
| O(3)-Cd(1)-S(1)   | 135.1(3) | O(18)-Cd(2)-S(2)  | 136.3(2)  |

---

**Table S2.** Selected bond lengths (Å) and angles (°) for **2**

|                   |           |                     |          |
|-------------------|-----------|---------------------|----------|
| Eu(1)-O(11)       | 2.299(12) | O(4)-Eu(1)-O(3)     | 66.3(4)  |
| Eu(1)-O(4)        | 2.334(12) | O(7)-Eu(1)-O(3)     | 87.0(4)  |
| Eu(1)-O(7)        | 2.357(10) | O(10)-Eu(1)-O(3)    | 128.8(4) |
| Eu(1)-O(10)       | 2.352(11) | O(13)-Eu(1)-O(3)    | 143.8(4) |
| Eu(1)-O(13)       | 2.355(10) | O(8)-Eu(1)-O(3)     | 130.6(4) |
| Eu(1)-O(8)        | 2.380(10) | O(11)-Eu(1)-O(6)    | 80.7(4)  |
| Eu(1)-O(3)        | 2.395(10) | O(4)-Eu(1)-O(6)     | 135.1(4) |
| Eu(1)-O(6)        | 2.552(10) | O(7)-Eu(1)-O(6)     | 72.5(3)  |
| Cd(1)-O(4)#1      | 2.217(11) | O(10)-Eu(1)-O(6)    | 132.5(4) |
| Cd(1)-O(12)       | 2.242(13) | O(13)-Eu(1)-O(6)    | 73.7(4)  |
| Cd(1)-O(10)       | 2.276(11) | O(8)-Eu(1)-O(6)     | 133.3(3) |
| Cd(1)-O(8)        | 2.299(10) | O(3)-Eu(1)-O(6)     | 70.2(4)  |
| Cd(1)-O(9)        | 2.312(14) | O(4)#1-Cd(1)-O(12)  | 111.0(5) |
| Cd(1)-O(8)#1      | 2.475(11) | O(4)#1-Cd(1)-O(10)  | 158.3(4) |
| Cd(2)-O(2)        | 2.197(12) | O(12)-Cd(1)-O(10)   | 90.4(4)  |
| Cd(2)-O(7)        | 2.242(10) | O(4)#1-Cd(1)-O(8)   | 107.4(4) |
| Cd(2)-N(3)        | 2.298(12) | O(12)-Cd(1)-O(8)    | 89.6(4)  |
| Cd(2)-N(4)        | 2.302(14) | O(10)-Cd(1)-O(8)    | 75.2(4)  |
| Cd(2)-O(6)        | 2.314(10) | O(4)#1-Cd(1)-O(9)   | 91.6(5)  |
| Cd(2)-S(2)        | 2.878(5)  | O(12)-Cd(1)-O(9)    | 99.6(5)  |
| Cd(3)-O(3)        | 2.219(11) | O(10)-Cd(1)-O(9)    | 80.8(4)  |
| Cd(3)-O(2)        | 2.328(11) | O(8)-Cd(1)-O(9)     | 154.3(4) |
| Cd(3)-N(1)        | 2.333(14) | O(4)#1-Cd(1)-O(8)#1 | 73.6(4)  |
| Cd(3)-N(2)        | 2.330(15) | O(12)-Cd(1)-O(8)#1  | 171.7(4) |
| Cd(3)-O(5)        | 2.388(12) | O(10)-Cd(1)-O(8)#1  | 85.6(4)  |
| Cd(3)-O(6)        | 2.430(11) | O(8)-Cd(1)-O(8)#1   | 82.3(3)  |
| Cd(3)-S(1)        | 2.940(5)  | O(9)-Cd(1)-O(8)#1   | 87.0(4)  |
| O(11)-Eu(1)-O(4)  | 99.9(4)   | O(2)-Cd(2)-O(7)     | 104.4(4) |
| O(11)-Eu(1)-O(7)  | 152.4(4)  | O(2)-Cd(2)-N(3)     | 139.4(5) |
| O(4)-Eu(1)-O(7)   | 94.5(4)   | O(7)-Cd(2)-N(3)     | 108.2(5) |
| O(11)-Eu(1)-O(10) | 66.1(4)   | O(2)-Cd(2)-N(4)     | 104.9(5) |
| O(4)-Eu(1)-O(10)  | 85.3(4)   | O(7)-Cd(2)-N(4)     | 80.8(4)  |
| O(7)-Eu(1)-O(10)  | 139.1(4)  | N(3)-Cd(2)-N(4)     | 103.6(5) |
| O(11)-Eu(1)-O(13) | 94.4(5)   | O(2)-Cd(2)-O(6)     | 82.4(4)  |
| O(4)-Eu(1)-O(13)  | 149.5(4)  | O(7)-Cd(2)-O(6)     | 79.3(4)  |
| O(7)-Eu(1)-O(13)  | 84.6(4)   | N(3)-Cd(2)-O(6)     | 80.5(4)  |
| O(10)-Eu(1)-O(13) | 76.0(4)   | N(4)-Cd(2)-O(6)     | 160.0(4) |
| O(11)-Eu(1)-O(8)  | 138.3(4)  | O(2)-Cd(2)-S(2)     | 95.1(3)  |
| O(4)-Eu(1)-O(8)   | 73.4(4)   | O(7)-Cd(2)-S(2)     | 149.0(3) |
| O(7)-Eu(1)-O(8)   | 68.5(3)   | N(3)-Cd(2)-S(2)     | 68.0(4)  |
| O(10)-Eu(1)-O(8)  | 72.3(4)   | N(4)-Cd(2)-S(2)     | 70.8(3)  |
| O(13)-Eu(1)-O(8)  | 78.0(4)   | O(6)-Cd(2)-S(2)     | 127.8(3) |
| O(11)-Eu(1)-O(3)  | 77.5(4)   | O(3)-Cd(3)-O(2)     | 86.9(4)  |

|                 |          |                 |          |
|-----------------|----------|-----------------|----------|
| O(3)-Cd(3)-N(1) | 163.9(4) | O(2)-Cd(3)-O(6) | 77.3(4)  |
| O(2)-Cd(3)-N(1) | 78.5(4)  | N(1)-Cd(3)-O(6) | 94.7(4)  |
| O(3)-Cd(3)-N(2) | 83.9(5)  | N(2)-Cd(3)-O(6) | 156.6(4) |
| O(2)-Cd(3)-N(2) | 91.1(5)  | O(5)-Cd(3)-O(6) | 67.4(4)  |
| N(1)-Cd(3)-N(2) | 103.0(5) | O(3)-Cd(3)-S(1) | 127.1(3) |
| O(3)-Cd(3)-O(5) | 90.8(4)  | O(2)-Cd(3)-S(1) | 135.3(3) |
| O(2)-Cd(3)-O(5) | 144.0(4) | N(1)-Cd(3)-S(1) | 69.0(4)  |
| N(1)-Cd(3)-O(5) | 97.0(5)  | N(2)-Cd(3)-S(1) | 68.3(4)  |
| N(2)-Cd(3)-O(5) | 124.3(4) | O(5)-Cd(3)-S(1) | 71.8(3)  |
| O(3)-Cd(3)-O(6) | 75.3(4)  | O(6)-Cd(3)-S(1) | 133.5(3) |

---
